# Supplementary material for: Time-calibrated molecular phylogeny of pteropods
Source: PubMed Central journal article supplement (PMC5467808; doi:10.1371/journal.pone.0177325), 2017-06-12

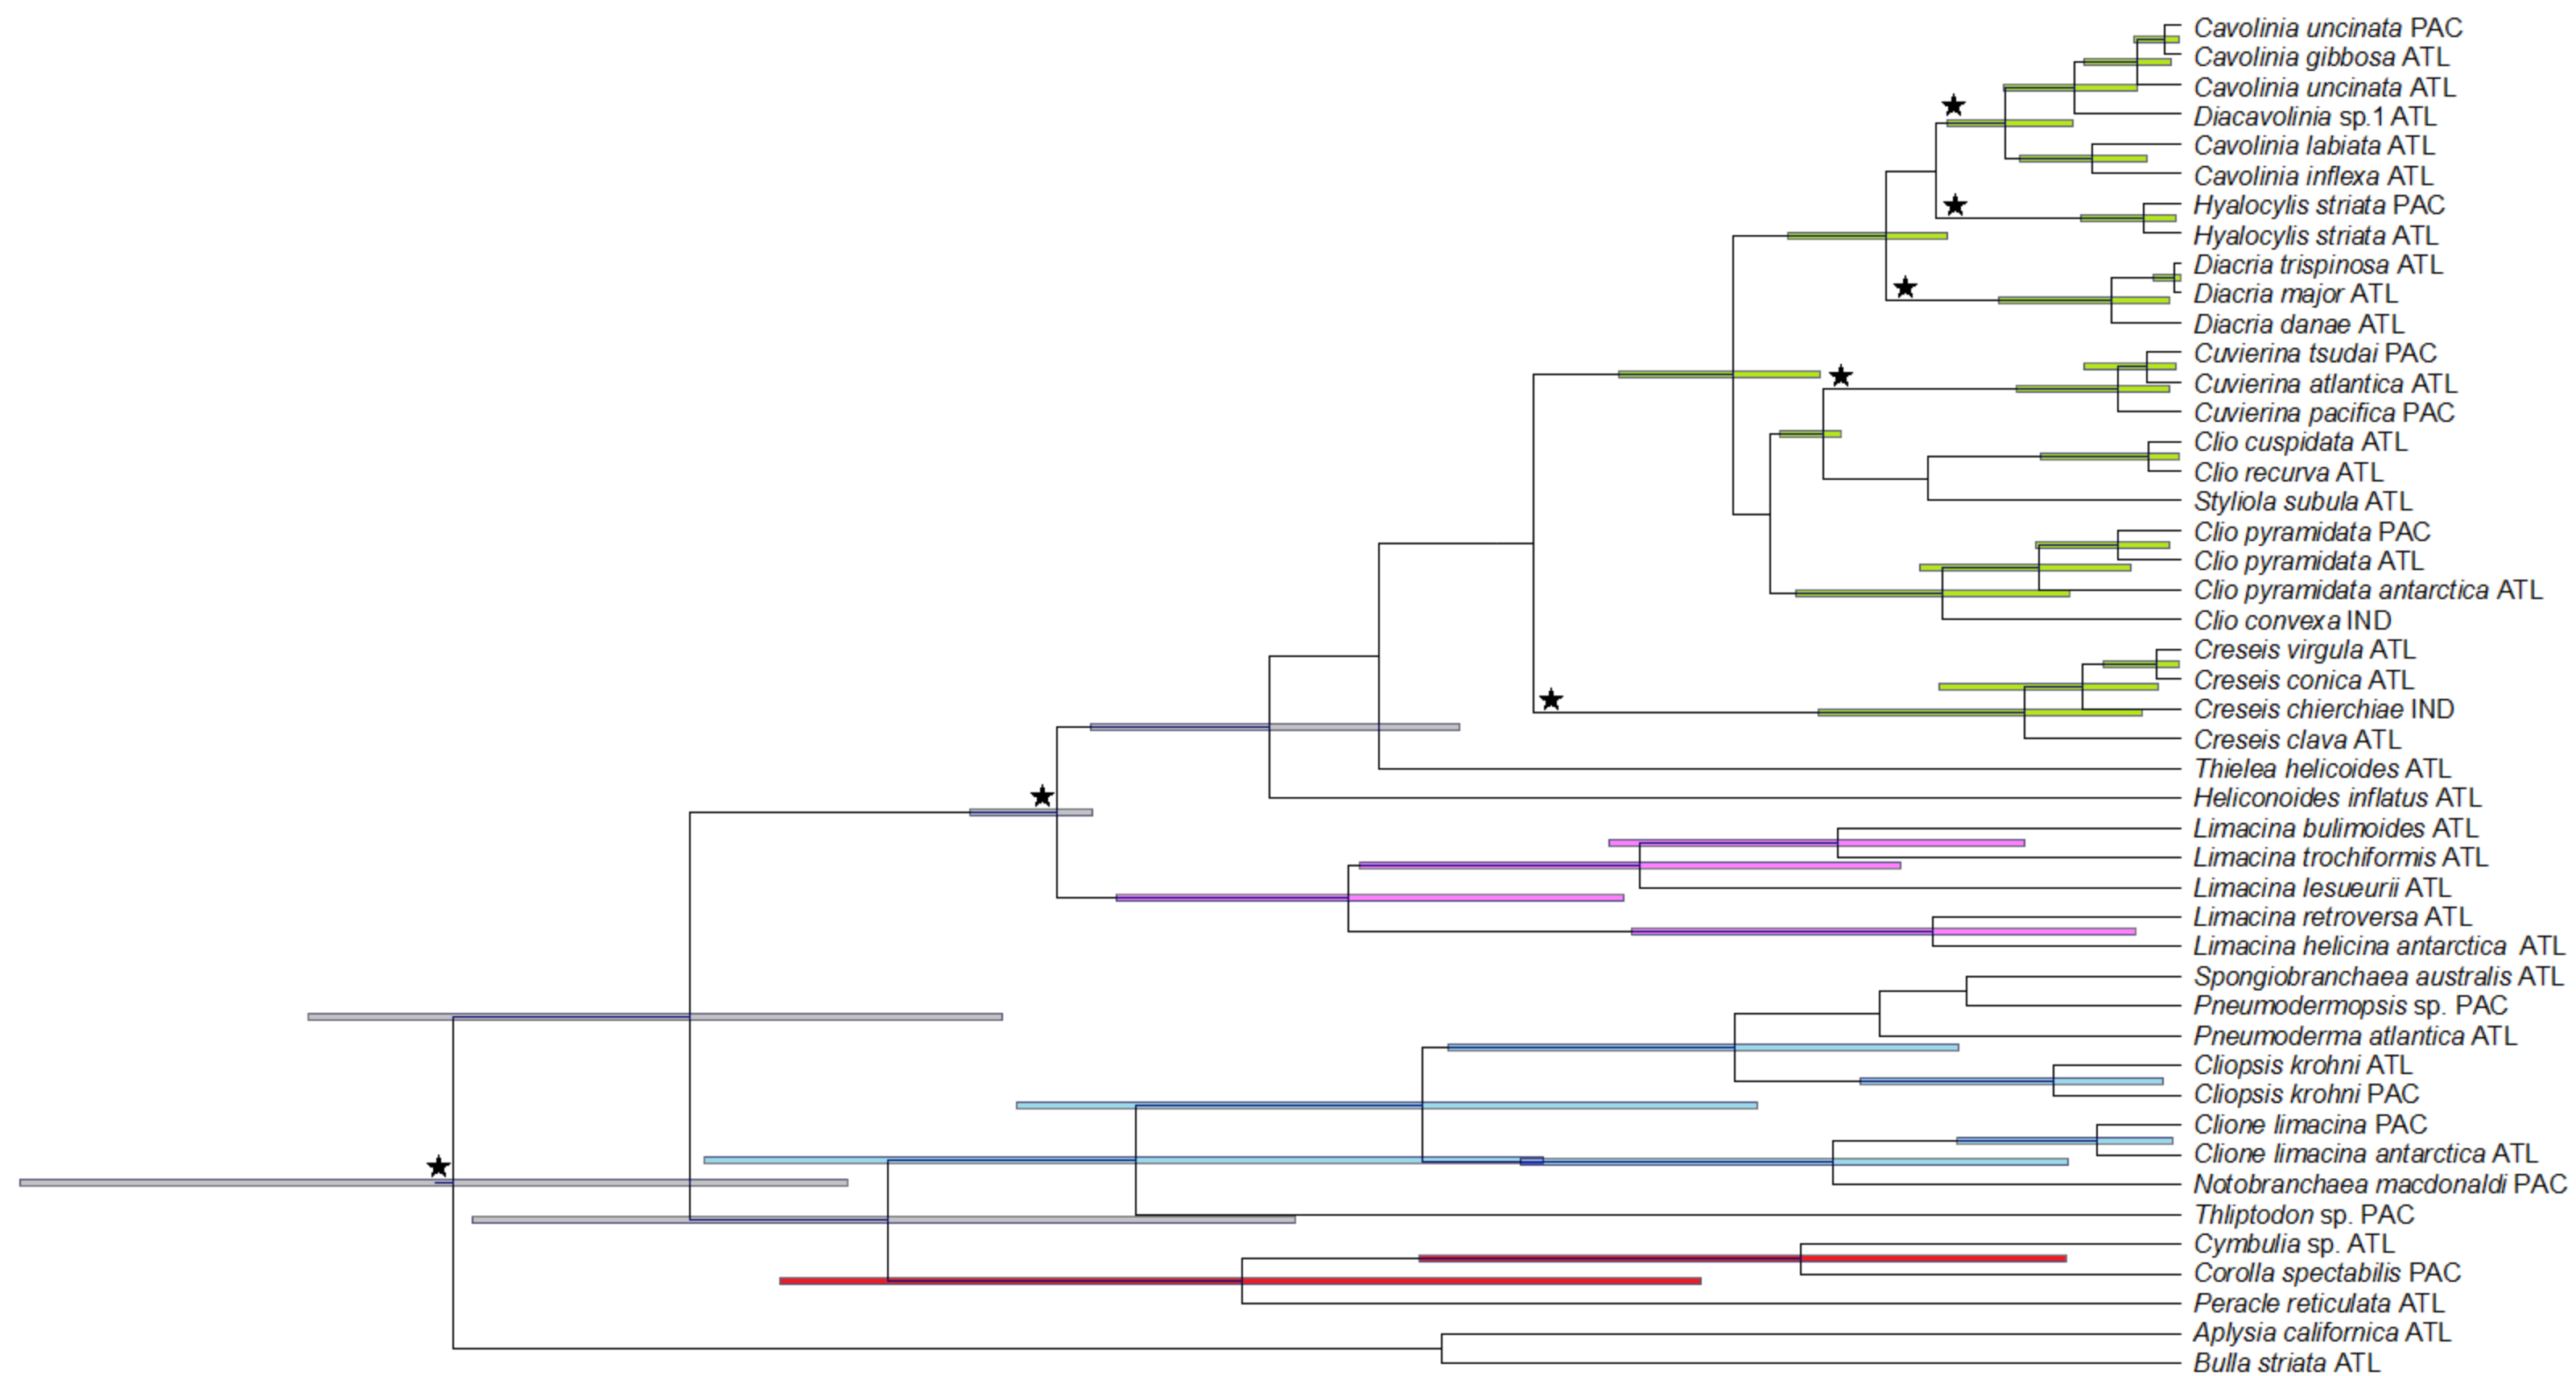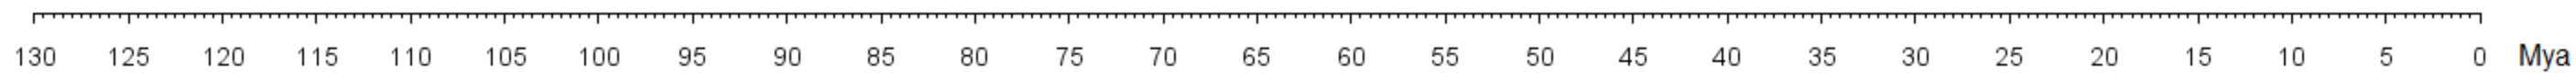

Supplement: pone.0177325.s007.pdf [file pone.0177325.s007.pdf]
