# Supplementary material for: Time-calibrated molecular phylogeny of pteropods
Source: PubMed Central journal article supplement (PMC5467808; doi:10.1371/journal.pone.0177325), 2017-06-12
Supplement: pone.0177325.s009.pdf [file pone.0177325.s009.pdf]

**S1 Table.** Overview of sequences used in combined and/or as single-gene phylogenetic analyses based on Cytochrome Oxidase I, 28S rRNA, and 18S rRNA. Numbers in the 9th column indicate their use in (1) single-gene Maximum Likelihood (ML), combined ML and combined Bayesian phylogenies, (2) single-gene ML and combined ML phylogenies, or (3) single-gene ML phylogenies. An asterisk indicates long-branch taxa that were excluded in separate multi-gene ML phylogenetic analyses. Bp = number of basepairs per sequence. *Clione limacina antarctica* sequences were obtained from a transcriptome (T). Picture numbers indicated with an asterisk represent juvenile specimens (available in the Dryad digital repository [57]).

| Taxonomy & Species                    | Sample information |                 |          |           |                         |         |                                                        | Genetics |          |          |          | Pictures N |
|---------------------------------------|--------------------|-----------------|----------|-----------|-------------------------|---------|--------------------------------------------------------|----------|----------|----------|----------|------------|
|                                       | Reference          | Collection date | Latitude | Longitude | Cruise                  | Station | Ocean/sea/region                                       | Used for | CO1      | 28S      | 18S      |            |
| <b>Thecosomata, Euthecosomata</b>     |                    |                 |          |           |                         |         |                                                        |          |          |          |          |            |
| <b>Cavolinoidea</b>                   |                    |                 |          |           |                         |         |                                                        |          |          |          |          |            |
| <i>Cavolinia gibbosa</i>              | [35]               | -               | -        | -         | ECOSUR                  | -       | Caribbean Sea                                          | 1        | KC774033 | KC774104 |          |            |
| <i>Cavolinia gibbosa</i>              | [36]               | 2006-04-13      | 33°31'N  | 69°58'W   | RHB0603                 | -       | North Atlantic Ocean                                   | 3        | FJ876856 |          |          |            |
| <i>Cavolinia globulosa</i>            | [35]               | -               | -        | -         | TARA                    | 41      | Gulf of Aden                                           | 3        |          | KC774101 |          |            |
| <i>Cavolinia globulosa</i>            | [35]               | -               | -        | -         | TARA                    | 42      | Indian Ocean (Maldives)                                | 3        |          | KC774141 |          |            |
| <i>Cavolinia globulosa</i>            | [36]               | 2006-04-25      | 14°00'N  | 55°00'W   | RHB0603                 | -       | North Atlantic Ocean                                   | 3        | FJ876857 |          |          |            |
| <i>Cavolinia inflexa</i>              | New                | 2008-10-20      | 11°49'N  | 32°49'W   | AMT18                   | 44      | North Atlantic Ocean                                   | 2        | MF048913 | MF048966 |          | 2          |
| <i>Cavolinia inflexa</i>              | New                | 2008-10-20      | 11°49'N  | 32°49'W   | AMT18                   | 44      | North Atlantic Ocean                                   | 1        | MF048914 | MF048967 |          | 2          |
| <i>Cavolinia labiata</i>              | [35]               | -               | -        | -         | TARA                    | 52      | Indian Ocean (East of Madagascar)                      | 3        | KC774038 |          |          |            |
| <i>Cavolinia labiata</i>              | [35]               | -               | -        | -         | TARA                    | 66      | South Atlantic Ocean (Cape Town)                       | 1        | KC774037 | KC774099 |          |            |
| <i>Cavolinia tridentata atlantica</i> | [36]               | 2007-01-22      | 46°21'S  | 140°32'E  | Aurora_Australis_2007.3 | -       | Southern Ocean (South of Australia)                    | 3        | FJ876861 |          |          |            |
| <i>Cavolinia uncinata</i>             | New                | 2011-01-31      | 18°07'N  | 87°44'W   | GU1101                  | 91      | Caribbean Sea                                          | 1        | MF048915 | MF048968 | MF049019 | 9          |
| <i>Cavolinia uncinata</i>             | New                | 2012-09-04      | 39°55'N  | 67°27'W   | NOAA PC201205           | ST23P4  | Northwest Atlantic Ocean                               | 2        | MF048916 | MF048969 | MF049020 | 1          |
| <i>Cavolinia uncinata</i>             | New                | 2012-02-24      | 24°22'N  | 109°13'W  | MBARI GOC 2012          | D342BW  | Gulf of California                                     | 1        | MF048917 | MF048970 | MF049021 | 1          |
| <i>Cavolinia uncinata</i>             | New                | 2012-02-24      | 24°22'N  | 109°13'W  | MBARI GOC 2012          | D342BW  | Gulf of California                                     | 2        | MF048918 | MF048971 | MF049022 |            |
| <i>Clio convexa</i>                   | [35]               | -               | -        | -         | TARA                    | 42      | Indian Ocean (Maldives)                                | 1        | KC774063 | KC774105 |          |            |
| <i>Clio convexa</i>                   | [35]               | -               | -        | -         | TARA                    | 53      | Indian Ocean (East of Madagascar)                      | 2        | KC774069 | KC774093 |          |            |
| <i>Clio cuspidata</i>                 | [40]               | 2008-10-27      | 12°50'S  | 25°00'W   | AMT18                   | 66      | South Atlantic Ocean                                   | 1        | KP292789 | KP292650 |          | 2          |
| <i>Clio cuspidata</i>                 | [35]               | -               | -        | -         | TARA                    | 42      | Indian Ocean (Maldives)                                | 2        | KC774064 | KC774098 |          |            |
| <i>Clio cuspidata</i>                 | [36]               | 2007-02-08      | 50°00'S  | 149°25'E  | Aurora_Australis_2007.3 | -       | Southern Ocean (South of Australia)                    | 3        | FJ876869 |          |          |            |
| <i>Clio cuspidata</i>                 | [36]               | 2007-02-08      | 50°00'S  | 149°25'E  | Aurora_Australis_2007.3 | -       | Southern Ocean (South of Australia)                    | 3        | FJ876870 |          |          |            |
| <i>Clio pyramidata antarctica</i>     | New                | 2008-11-07      | 45°13'S  | 44°37'W   | AMT18                   | 101     | South Atlantic / Southern Ocean                        | 1        | MF048919 | MF048972 | MF049023 | 1          |
| <i>Clio pyramidata antarctica</i>     | [36]               | 2007-02-08      | 50°00'S  | 149°25'E  | Aurora_Australis_2007.3 | -       | Southern Ocean (South of Australia)                    | 3        | FJ876876 |          |          |            |
| <i>Clio pyramidata lanceolata</i>     | New                | 2000-03         | 43°30'N  | 07°12'E   | KP                      | -       | Mediterranean Sea (Ligurian Sea: Villefranche-Sur-Mer) | 2        | MF048920 | MF048973 | MF049024 |            |
| <i>Clio pyramidata pyramidata</i>     | [40]+New           | 2008-10-15      | 24°45'N  | 40°05'W   | AMT18                   | 27      | North Atlantic Ocean                                   | 1        | KP292791 | KP292652 | MF049025 | 2          |
| <i>Clio pyramidata</i>                | New                | 2012-02-17      | 24°11'N  | 109°38'W  | MBARI GOC 2012          | D333T   | Gulf of California                                     | 1        | MF048921 | MF048974 | MF049026 |            |
| <i>Clio pyramidata</i>                | New                | 2012-02-17      | 24°11'N  | 109°38'W  | MBARI GOC 2012          | D333T   | Gulf of California                                     | 2        | MF048922 | MF048975 | MF049027 |            |
| <i>Clio recurva</i>                   | [40]+New           | 2004-06-09      | 59°58'N  | 25°45'W   | MAR-ECO                 | 2       | North Atlantic Ocean                                   | 1        | KP292790 | KP292651 | MF049028 |            |
| <i>Clio recurva</i>                   | New                | 2004-06-19      | 51°34'N  | 33°17'W   | MAR-ECO                 | 16      | North Atlantic Ocean                                   | 3        | MF048923 |          |          | 1          |
| <i>Clio recurva</i>                   | [36]               | 2007-01-20      | 45°00'S  | 142°59'E  | Aurora_Australis_2007.3 | -       | Southern Ocean (South of Australia)                    | 3        | FJ876880 |          |          |            |

|                                          |          |            |         |          |                         |    |                                               |   |          |          |          |    |
|------------------------------------------|----------|------------|---------|----------|-------------------------|----|-----------------------------------------------|---|----------|----------|----------|----|
| <i>Creseis chierchiae</i>                | [35]     | -          | -       | -        | CRER 2                  | -  | Caribbean Sea (Yucatan/Belize)                | 3 | KC774136 |          |          |    |
| <i>Creseis chierchiae</i>                | [35]     | -          | -       | -        | TARA                    | 41 | Gulf of Aden                                  | 1 | KC774044 | KC774137 |          |    |
| <i>Creseis clava</i>                     | New      | 2011-01-25 | 18°43'N | 87°40'W  | GU1101                  | 53 | Caribbean Sea                                 | 1 |          |          | MF049029 | 5  |
| <i>Creseis clava</i>                     | [38]     | 2007-01-21 | 18°47'N | 87°08'W  | GU0701                  | 35 | Caribbean Sea                                 | 3 | HM385035 |          |          | 1  |
| <i>Creseis clava</i>                     | [35]     | -          | -       | -        | TARA                    | 41 | Gulf of Aden                                  | 3 | KC774052 |          |          |    |
| <i>Creseis clava</i>                     | [35]     | -          | -       | -        | CRER 2                  | -  | Caribbean Sea (Yucatan/Belize)                | 1 | KC774053 | KC774125 |          |    |
| <i>Creseis clava</i>                     | [35]     | -          | -       | -        | ANTEDON                 | -  | Mediterranean Sea (Gulf of Lyon, Cassidaigne) | 2 | KC774054 | KC774126 |          |    |
| <i>Creseis clava</i>                     | [36]     | 2006-11-17 | 16°01'S | 119°19'E | Galathea_2006           | -  | Indian Ocean                                  | 3 | FJ876888 |          |          |    |
| <i>Creseis conica</i>                    | New      | 2011-01-31 | 18°07'N | 87°44'W  | GU1101                  | 91 | Caribbean Sea                                 | 1 |          | MF048976 | MF049030 | 2  |
| <i>Creseis conica</i>                    | New      | 2011-01-31 | 18°07'N | 87°44'W  | GU1101                  | 91 | Caribbean Sea                                 | 1 | MF048924 | MF048977 |          | 2  |
| <i>Creseis conica</i>                    | New      | 2011-01-31 | 18°07'N | 87°44'W  | GU1101                  | 91 | Caribbean Sea                                 | 2 | MF048925 |          | MF049031 | 2  |
| <i>Creseis virgula</i>                   | [35]     | -          | -       | -        | ECOSUR                  | -  | Caribbean Sea (Yucatan/Belize)                | 1 | KC774045 | KC774128 |          |    |
| <i>Creseis virgula</i>                   | [35]     | -          | -       | -        | TARA                    | 34 | Red Sea                                       | 2 | KC774046 | KC774129 |          |    |
| <i>Creseis virgula</i>                   | [35]     | -          | -       | -        | TARA                    | 42 | Indian Ocean (Maldives)                       | 2 | KC774047 | KC774130 |          |    |
| <i>Cuvierina atlantica</i>               | [40]+New | 2004-07-01 | 41°29'N | 28°19'W  | MAR-ECO                 | 36 | North Atlantic Ocean                          | 1 | KP292669 |          | MF049032 | 2  |
| <i>Cuvierina atlantica</i>               | [40]     | 2004-07-01 | 41°29'N | 28°19'W  | MAR-ECO                 | 36 | North Atlantic Ocean                          | 1 | KP292675 | KP292622 |          | 2  |
| <i>Cuvierina columnella</i>              | [40]     | 2001-12-24 | 36°05'S | 149°29'W | DRFT07RR                | 11 | South Pacific Ocean                           | 2 | KP292728 | KP292634 |          | 2  |
| <i>Cuvierina tsudai</i>                  | [40]+New | 2010-09-29 | 27°08'N | 125°33'E | R/V Tansei-MarukT-10-20 | 5  | Northwest Pacific Ocean (East China Sea)      | 2 |          | KP292642 | MF049033 | 2  |
| <i>Cuvierina tsudai</i>                  | [40]+New | 2010-09-29 | 27°08'N | 125°33'E | R/V Tansei-MarukT-10-20 | 5  | Northwest Pacific Ocean (East China Sea)      | 1 | KP292767 | MF048978 | MF049034 | 2  |
| <i>Cuvierina tsudai</i>                  | [40]     | 2010-09-29 | 27°08'N | 125°33'E | R/V Tansei-MarukT-10-20 | 5  | Northwest Pacific Ocean (East China Sea)      | 2 | KP292768 |          |          | 2  |
| <i>Cuvierina pacifica</i>                | [40]     | 2012-01-18 | 23°00'S | 100°00'W | KH-11-10                | 21 | South Pacific Ocean                           | 1 | KP292780 | KP292647 |          | 2  |
| <i>Cuvierina pacifica</i>                | [40]     | 2001-10-14 | 29°05'S | 176°09'W | COOK14MV                | 19 | South Pacific Ocean                           | 2 | KP292785 | KP292648 |          | 2  |
| <i>Cuvierina urceolaris</i>              | [40]     | 2003-06-06 | 12°52'S | 94°26'E  | VANC10MV                | 22 | Indian Ocean                                  | 2 | KP292729 | KP292635 |          | 2  |
| <i>Cuvierina urceolaris</i>              | [35]     | -          | -       | -        | TARA                    | 52 | Indian Ocean (East of Madagascar)             | 2 | KC774071 | KC774107 |          |    |
| <i>Diacavolinia longirostris</i> (sp. 1) | [35]     | -          | -       | -        | ECOSUR                  | -  | Caribbean Sea (Yucatan/Belize)                | 3 |          |          | KC774118 |    |
| <i>Diacavolinia</i> sp. 1                | New      | 2008-10-22 | 5°20'N  | 28°31'W  | AMT18                   | 50 | North Atlantic Ocean                          | 1 | MF048926 | MF048979 | MF049035 |    |
| <i>Diacavolinia</i> sp. 1                | New      | 2008-10-23 | 2°47'N  | 26°51'W  | AMT18                   | 56 | North Atlantic Ocean                          | 3 | MF048927 |          |          |    |
| <i>Diacavolinia vanutrechtii</i> (sp. 2) | [39]     | 2007-10&11 | 13°01'N | 105°01'W | RV Seward               | -  | East Pacific Ocean                            | 3 | JX183614 |          |          | 3  |
| <i>Diacavolinia vanutrechtii</i> (sp. 2) | [39]     | 2007-10&11 | 13°01'N | 105°01'W | RV Seward               | -  | East Pacific Ocean                            | 3 | JX183616 |          |          | 3  |
| <i>Diacria danae</i>                     | New      | 2008-10-30 | 22°47'S | 25°01'W  | AMT18                   | 79 | South Atlantic Ocean                          | 1 | MF048928 | MF048980 | MF049036 | 1* |
| <i>Diacria danae</i>                     | [35]     | -          | -       | -        | CRER 2                  | -  | Caribbean Sea (Yucatan/Belize)                | 3 | KC774075 | KC774113 |          |    |
| <i>Diacria danae</i>                     | [35]     | -          | -       | -        | TARA                    | 50 | Indian Ocean (North)                          | 3 | KC774076 |          |          |    |
| <i>Diacria danae</i>                     | [35]     | -          | -       | -        | TARA                    | 58 | Indian Ocean (Southwest, Mozambique)          | 3 | KC774077 |          |          |    |
| <i>Diacria danae</i>                     | [33]     | -          | -       | -        | -                       | -  | North Atlantic Ocean (Canary Islands)         | 2 | DQ238001 | DQ237987 | DQ237968 |    |
| <i>Diacria major</i>                     | New      | 2008-10-14 | 27°38'N | 37°02'W  | AMT18                   | 24 | North Atlantic Ocean                          | 1 | MF048929 | MF048981 | MF049037 | 1* |
| <i>Diacria major</i>                     | New      | 2008-10-16 | 22°36'N | 40°16'W  | AMT18                   | 32 | North Atlantic Ocean                          | 3 | MF048930 |          |          | 1* |
| <i>Diacria trispinosa</i>                | New      | 2011-01-28 | 16°22'N | 88°02'W  | GU1101                  | 77 | Caribbean Sea                                 | 1 | MF048931 | MF048982 | MF049038 | 4  |
| <i>Diacria trispinosa</i>                | New      | 2011-01-28 | 16°22'N | 88°02'W  | GU1101                  | 77 | Caribbean Sea                                 | 2 | MF048932 | MF048983 | MF049039 | 4  |

|                                     |      |            |         |          |                  |       |                                             |    |          |                   |          |
|-------------------------------------|------|------------|---------|----------|------------------|-------|---------------------------------------------|----|----------|-------------------|----------|
| <i>Hyalocylis striata</i>           | New  | 2008-10-11 | 36°01'N | 27°44'W  | AMT18            | 15    | North Atlantic Ocean                        | 2  | MF048984 |                   | 2        |
| <i>Hyalocylis striata</i>           | New  | 2011-01-16 | 20°44'N | 86°24'W  | GU1101           | 10    | Caribbean Sea                               | 1  | MF048933 |                   | 2        |
| <i>Hyalocylis striata</i>           | New  | 2011-01-16 | 20°44'N | 86°24'W  | GU1101           | 10    | Caribbean Sea                               | 1  |          | MF048985 MF049040 | 2        |
| <i>Hyalocylis striata</i>           | New  | 2011-01-16 | 20°44'N | 86°24'W  | GU1101           | 10    | Caribbean Sea                               | 2  | MF048934 |                   | 2        |
| <i>Hyalocylis striata</i>           | New  | 2012-02-17 | 24°11'N | 109°38'W | MBARI GOC 2012   | D333T | Gulf of California                          | 2  | MF048935 | MF048986 MF049042 | 1        |
| <i>Hyalocylis striata</i>           | New  | 2012-02-17 | 24°11'N | 109°38'W | MBARI GOC 2012   | D333T | Gulf of California                          | 1  | MF048936 | MF048987 MF049043 |          |
| <i>Styliola subula</i>              | New  | 2008-10-28 | 16°38'S | 25°00'W  | AMT18            | 70    | South Atlantic Ocean                        | 2  |          | MF048988 MF049044 | 1        |
| <i>Styliola subula</i>              | New  | 2011-01-19 | 19°21'N | 87°22'W  | GU1101           | 29    | Caribbean Sea                               | 1  |          | MF048989 MF049045 | 3        |
| <i>Styliola subula</i>              | [38] | 2007-01-24 | 17°54'N | 87°54'W  | -                | -     | Caribbean Sea                               | 1  | KF200174 |                   | 1        |
| <i>Styliola subula</i>              | [38] | 2007-01-29 | 18°11'N | 87°45'W  | -                | -     | Caribbean Sea                               | 2  | KF200175 |                   | 1        |
| <b>Limaciniidae</b>                 |      |            |         |          |                  |       |                                             |    |          |                   |          |
| <i>Heliconoides inflatus</i>        | New  | 2008-10-21 | 8°39'N  | 30°43'W  | AMT18            | 47    | North Atlantic Ocean                        | 1* | MF048937 |                   | 1        |
| <i>Heliconoides inflatus</i>        | New  | 2008-10-26 | 08°50'S | 25°00'W  | AMT18            | 63    | South Atlantic Ocean                        | 3  | MF048938 |                   | 1        |
| <i>Heliconoides inflatus</i>        | New  | 2008-10-26 | 08°50'S | 25°00'W  | AMT18            | 63    | South Atlantic Ocean                        | 2* |          | MF048990          |          |
| <i>Heliconoides inflatus</i>        | New  | 2008-11-04 | 36°10'S | 35°03'W  | AMT18            | 94    | South Atlantic Ocean                        | 2* |          |                   | MF049047 |
| <i>Heliconoides inflatus</i>        | New  | 2008-11-04 | 36°10'S | 35°03'W  | AMT18            | 94    | South Atlantic Ocean                        | 2* | MF048939 |                   | 1        |
| <i>Heliconoides inflatus</i>        | New  | 2008-11-04 | 36°10'S | 35°03'W  | AMT18            | 94    | South Atlantic Ocean                        | 3  | MF048940 |                   | 1        |
| <i>Heliconoides inflatus</i>        | New  | 2010-03-25 | 42°37'N | 18°06'E  | KP               | 4     | Mediterranean Sea (Adriatic Sea: Dubrovnik) | 1* |          | MF048991          |          |
| <i>Limacina bulimoides</i>          | New  | 2008-10-20 | 11°49'N | 32°49'W  | AMT18            | 44    | North Atlantic Ocean                        | 3  |          | MF048992          | 1        |
| <i>Limacina bulimoides</i>          | New  | 2008-10-31 | 26°33'S | 25°00'W  | AMT18            | 83    | South Atlantic Ocean                        | 1* |          | MF048993 MF049048 |          |
| <i>Limacina helicina antarctica</i> | New  | 2008-11-07 | 45°13'S | 44°37'W  | AMT18            | 101   | South Atlantic / Southern Ocean             | 1  | MF048941 | MF048994 MF049049 | 2        |
| <i>Limacina helicina antarctica</i> | New  | 2008-11-07 | 45°13'S | 44°37'W  | AMT18            | 101   | South Atlantic / Southern Ocean             | 2  | MF048942 | MF048995          | 2        |
| <i>Limacina helicina antarctica</i> | [37] | -          | -       | -        | -                | -     | Southern Ocean (Amundsen Sea)               | 3  | GQ861824 |                   |          |
| <i>Limacina helicina antarctica</i> | [37] | -          | -       | -        | -                | -     | Southern Ocean (Amundsen Sea)               | 3  | GQ861825 |                   |          |
| <i>Limacina helicina helicina</i>   | [36] | 2003-12-03 | 60°32'N | 147°48'W | Alpha-Helix-2003 | -     | Gulf of Alaska (Prince Williams Sound)      | 3  | FJ876923 |                   |          |
| <i>Limacina helicina helicina</i>   | [36] | 2007-09-04 | 87°01'N | 146°21'W | PS-ARK-23-2      | -     | Arctic Ocean                                | 3  | FJ876924 |                   |          |
| <i>Limacina lesueurii</i>           | New  | 2008-10-20 | 11°49'N | 32°49'W  | AMT18            | 44    | North Atlantic Ocean                        | 2  |          | MF048996          | 2        |
| <i>Limacina lesueurii</i>           | New  | 2008-10-20 | 11°49'N | 32°49'W  | AMT18            | 44    | North Atlantic Ocean                        | 1  |          | MF048997 MF049050 | 2        |
| <i>Limacina lesueurii</i>           | New  | 2012-11-09 | 25°29'S | 25°00'W  | AMT22            | 56A   | South Atlantic Ocean                        | 2  | MF048943 |                   |          |
| <i>Limacina lesueurii</i>           | New  | 2012-11-09 | 25°29'S | 25°00'W  | AMT22            | 56A   | South Atlantic Ocean                        | 1  | MF048944 |                   |          |
| <i>Limacina retroversa</i>          | New  | 2004-06-12 | 56°35'N | 31°14'W  | MAR-ECO          | 6     | North Atlantic Ocean                        | 1  | MF048945 | MF048998 MF049051 |          |
| <i>Limacina retroversa</i>          | New  | 2004-06-23 | 50°42'N | 27°31'W  | MAR-ECO          | 22    | North Atlantic Ocean                        | 2  | MF048946 | MF048999 MF049052 |          |
| <i>Limacina trochiformis</i>        | New  | 2012-10-21 | 27°36'N | 36°22'W  | AMT22            | 19    | North Atlantic Ocean                        | 1  | MF048947 |                   |          |
| <i>Limacina trochiformis</i>        | New  | 2012-11-12 | 30°10'S | 27°54'W  | AMT22            | 60    | South Atlantic Ocean                        | 2  | MF048948 |                   |          |
| <i>Limacina trochiformis</i>        | New  | 2011-01-22 | 18°52'N | 87°17'W  | GU1101           | 34    | Caribbean Sea                               | 1  |          | MF049000          | 2        |
| <i>Limacina trochiformis</i>        | New  | 2011-01-22 | 18°52'N | 87°17'W  | GU1101           | 34    | Caribbean Sea                               | 2  |          | MF049001          | 2        |
| <i>Thielea helicooides</i>          | New  | 2004-06-21 | 52°45'N | 30°30'W  | MAR-ECO          | 20    | North Atlantic Ocean                        | 1  | MF048949 | MF049002          | 2        |
| <i>Thielea helicooides</i>          | New  | 2004-06-23 | 50°42'N | 27°31'W  | MAR-ECO          | 22    | North Atlantic Ocean                        | 2  | MF048950 | MF049003          |          |

| <b>Thecosomata, Pseudothecosomata</b> |      |            |         |          |                 |           |                                               |   |          |          |          |
|---------------------------------------|------|------------|---------|----------|-----------------|-----------|-----------------------------------------------|---|----------|----------|----------|
| <b>Cymbuliidae</b>                    |      |            |         |          |                 |           |                                               |   |          |          |          |
| <i>Corolla spectabilis</i>            | New  | 2012-11-12 | 34°15'N | 120°09'W | UNOLS CSTC 2012 | SB2SB3MOC | Northeast Pacific Ocean (Southern California) | 3 | MF048951 | MF049004 |          |
| <i>Corolla spectabilis</i>            | New  | 2012-11-12 | 34°15'N | 120°09'W | UNOLS CSTC 2012 | SB2SB3MOC | Northeast Pacific Ocean (Southern California) | 2 | MF048952 | MF049005 | MF049053 |
| <i>Corolla spectabilis</i>            | New  | 2012-02-24 | 24°22'N | 109°13'W | MBARI GOC 2012  | D342BW    | Gulf of California                            | 3 | MF048953 |          | 1        |
| <i>Corolla spectabilis</i>            | New  | 2012-02-24 | 24°22'N | 109°13'W | MBARI GOC 2012  | D342BW    | Gulf of California                            | 1 | MF048954 | MF049006 | MF049054 |
| <i>Cymbulia sibogae</i>               | [36] | 2007-11-11 | 3°13'N  | 14°04'W  | PS-ANT-24-1     | -         | North Atlantic Ocean                          | 3 | FJ876932 |          |          |
| <i>Cymbulia</i> sp.                   | [35] | -          | -       | -        | ECOSUR          | -         | Caribbean Sea (Yucatan/Belize)                | 3 |          | KC774158 |          |
| <i>Cymbulia</i> sp.                   | [35] | -          | -       | -        | TARA            | 30        | Mediterranean Sea (East)                      | 1 | KC774090 | KC774159 |          |
| <i>Gleba cordata</i>                  | [36] | 2006-04-19 | 25°00'N | 59°57'W  | RHB0603         | -         | North Atlantic Ocean                          | 3 | FJ876933 |          |          |
| <b>Desmopteridae</b>                  |      |            |         |          |                 |           |                                               |   |          |          |          |
| <i>Desmopterus</i> sp.                | [35] | -          | -       | -        | TARA            | 40        | Gulf of Aden                                  | 3 |          | KC774167 |          |
| <b>Peracliidae</b>                    |      |            |         |          |                 |           |                                               |   |          |          |          |
| <i>Peracle bispinosa</i>              | [36] | 2007-11-11 | 3°31'N  | 14°01'W  | PS-ANT-24-1     | -         | North Atlantic Ocean                          | 3 | FJ876936 |          |          |
| <i>Peracle bispinosa</i>              | [36] | 2007-11-11 | 3°31'N  | 14°01'W  | PS-ANT-24-1     | -         | North Atlantic Ocean                          | 3 | FJ876938 |          |          |
| <i>Peracle reticulata</i>             | New  | 2008-10-12 | 33°18'N | 30°48'W  | AMT18           | 19        | North Atlantic Ocean                          | 3 |          | MF049007 | 1        |
| <i>Peracle reticulata</i>             | New  | 2008-10-29 | 19°07'S | 25°00'W  | AMT18           | 75        | South Atlantic Ocean                          | 1 |          | MF049008 | MF049055 |
| <i>Peracle reticulata</i>             | [35] | -          | -       | -        | CRER 2          | -         | Caribbean Sea (Yucatan/Belize)                | 1 | KC774088 |          |          |
| <i>Peracle reticulata</i>             | [35] | -          | -       | -        | ANTEDON         | -         | Mediterranean Sea (Gulf of Lyon, Cassidaigne) | 3 | KC774089 |          |          |
| <i>Peracle valdiviae</i>              | [36] | 2007-11-17 | 13°25'S | 0°39'W   | PS-ANT-24-1     | -         | South Atlantic Ocean                          | 3 | FJ876940 |          |          |
| <b>Gymnosomata</b>                    |      |            |         |          |                 |           |                                               |   |          |          |          |
| <b>Clionidae</b>                      |      |            |         |          |                 |           |                                               |   |          |          |          |
| <i>Clione limacina antarctica</i>     | [34] | 2009-02-20 | 61°46'S | 45°27'W  | Nerida Wilson   | -         | Southern Ocean (South Orkney Islands)         | 1 | CEF048   | CEF048   | CEF048   |
| <i>Clione limacina</i>                | New  | 2012-07-17 | 36°42'N | 122°03'N | MBARI MW 2012   | D416T.11  | Northeast Pacific Ocean (Northern California) | 1 | MF048955 | MF049009 | MF049056 |
| <i>Clione limacina</i>                | New  | 2012-07-17 | 36°42'N | 122°03'N | MBARI MW 2012   | D416T.15  | Northeast Pacific Ocean (Northern California) | 2 | MF048956 | MF049010 | MF049057 |
| <i>Clione limacina</i>                | [36] | 2006-04-13 | 33°31'N | 69°58'W  | RHB0603         | -         | North Atlantic Ocean                          | 3 | FJ876941 |          |          |
| <i>Clione limacina</i>                | [36] | 2005-07-11 | 74°35'N | 151°56'W | Healy 05/2      | -         | Arctic Ocean (Canadian Basin)                 | 3 | FJ876944 |          |          |
| <i>Thliptodon</i> sp.                 | New  | 2012-02-24 | 24°22'N | 109°13'W | MBARI GOC 2012  | D342BW    | Gulf of California                            | 1 | MF048957 | MF049011 | MF049058 |
| <i>Thliptodon</i> sp.                 | New  | 2013-06-09 | 36°35'N | 122°31'W | MBARI MW 2013   | D484D3    | Northeast Pacific Ocean (Northern California) | 2 | MF048958 | MF049012 | MF049059 |
| <i>Thliptodon diaphanus</i>           | [36] | 2006-04-20 | 24°50'N | 60°27'W  | RHB0603         | -         | North Atlantic Ocean                          | 3 | FJ876950 |          |          |
| <b>Cliopsidae</b>                     |      |            |         |          |                 |           |                                               |   |          |          |          |
| <i>Cliopsis krohni</i>                | New  | 2013-06-09 | 36°34'N | 122°31'W | MBARI MW 2013   | D484T     | Northeast Pacific Ocean (Northern California) | 1 | MF048959 | MF049013 | MF049060 |
| <i>Cliopsis krohni</i>                | New  | 2013-06-09 | 36°34'N | 122°31'W | MBARI MW 2013   | D484T     | Northeast Pacific Ocean (Northern California) | 3 | MF048960 |          | 1        |
| <i>Cliopsis krohni</i>                | New  | 2013-08-30 | 39°56'N | 67°17'W  | NOAA PC201205   | NWAT1     | Northwest Atlantic Ocean                      | 1 | MF048961 | MF049014 | MF049061 |
| <i>Cliopsis krohni</i>                | New  | 2012-09-04 | 39°57'N | 67°27'W  | NOAA PC201205   | NWAT20    | Northwest Atlantic Ocean                      | 2 | MF048962 | MF049015 | MF049062 |
| <b>Notobranchaeidae</b>               |      |            |         |          |                 |           |                                               |   |          |          |          |
| <i>Notobranchaea macdonaldi</i>       | New  | 2013-03-22 | 36°41'N | 122°10'W | MBARI MW 2013   | D448T     | Northeast Pacific Ocean (Northern California) | 1 | MF048963 | MF049016 | 1        |

| <b>Pneumodermatidae</b>                   |      |            |         |          |                |       |                                                         |   |          |          |          |   |
|-------------------------------------------|------|------------|---------|----------|----------------|-------|---------------------------------------------------------|---|----------|----------|----------|---|
| <i>Pneumoderma atlantica</i>              | [33] | -          | -       | -        | -              | -     | North Atlantic / Indian / Pacific Ocean (USA/Australia) | 1 | DQ238003 | DQ237989 | DQ237970 |   |
| <i>Pneumoderma violaceum</i>              | [36] | 2007-11-08 | 11°23'N | 20°21'W  | PS-ANT-24-1    | -     | North Atlantic Ocean                                    | 3 | FJ876945 |          |          |   |
| <i>Pneumodermopsis macrochira</i>         | [36] | 2006-04-16 | 29°52'N | 70°05'W  | RHB0603        | -     | North Atlantic Ocean                                    | 3 | FJ876946 |          |          |   |
| <i>Pneumodermopsis</i> sp.                | New  | 2012-02-12 | 23°42'N | 108°49'W | MBARI GOC 2012 | D339T | Gulf of California                                      | 1 | MF048964 | MF049017 | MF049063 | 1 |
| <i>Pneumodermopsis</i> sp.                | New  | 2012-02-12 | 23°42'N | 108°49'W | MBARI GOC 2012 | D339T | Gulf of California                                      | 2 | MF048965 | MF049018 | MF049064 |   |
| <i>Schizobranchium polycotylum</i>        | [36] | 2007-11-11 | 3°31'N  | 14°01'W  | PS-ANT-24-1    | -     | North Atlantic Ocean                                    | 3 | FJ876949 |          |          |   |
| <i>Spongiobranchaea australis</i>         | [33] | -          | -       | -        | -              | -     | Southern Ocean (Scotia Arc)                             | 1 | DQ238002 | DQ237988 | DQ237969 |   |
| <b>Outgroup taxa</b>                      |      |            |         |          |                |       |                                                         |   |          |          |          |   |
| <b>Cephalaspidea, Bulloidea, Bullidae</b> |      |            |         |          |                |       |                                                         |   |          |          |          |   |
| <i>Bulla striata</i>                      | [33] | -          | -       | -        | -              | -     | North Atlantic Ocean (Bermuda)                          | 1 | DQ238005 | AY427477 | AY427512 |   |
| <b>Anaspidea, Aplysioidea, Aplysiidae</b> |      |            |         |          |                |       |                                                         |   |          |          |          |   |
| <i>Aplysia californica</i>                | [33] | -          | -       | -        | -              | -     | Atlantic Ocean                                          | 1 | AF077759 | AY026366 | AY039804 |   |
